# Supplementary material
Source: PubMed Central journal article supplement (PMC2583494)

Figure: Dendrogram depicting the relatedness of the 468 *E. coli* isolates analyzed by Rep-PCR during this study. Patterns were analyzed using curve-based methods with an optimization value of 8.0, and Pearson's product-moment algorithm was used to correlate the densitometric curves. The field Group represents the Control (Group=1) and the Treatment (Group=2) cows. The field Day corresponds to Figure 1 in the manuscript and represents the Day of sampling. The field Animal is the individual identification for the cow. The field *cmy-2* Status depicts whether the *E. coli* isolate possessed the *bla*<sub>CMY-2</sub> gene.

Pearson correlation (Opt:8.00%) [0.0%-100.0%]

BOX

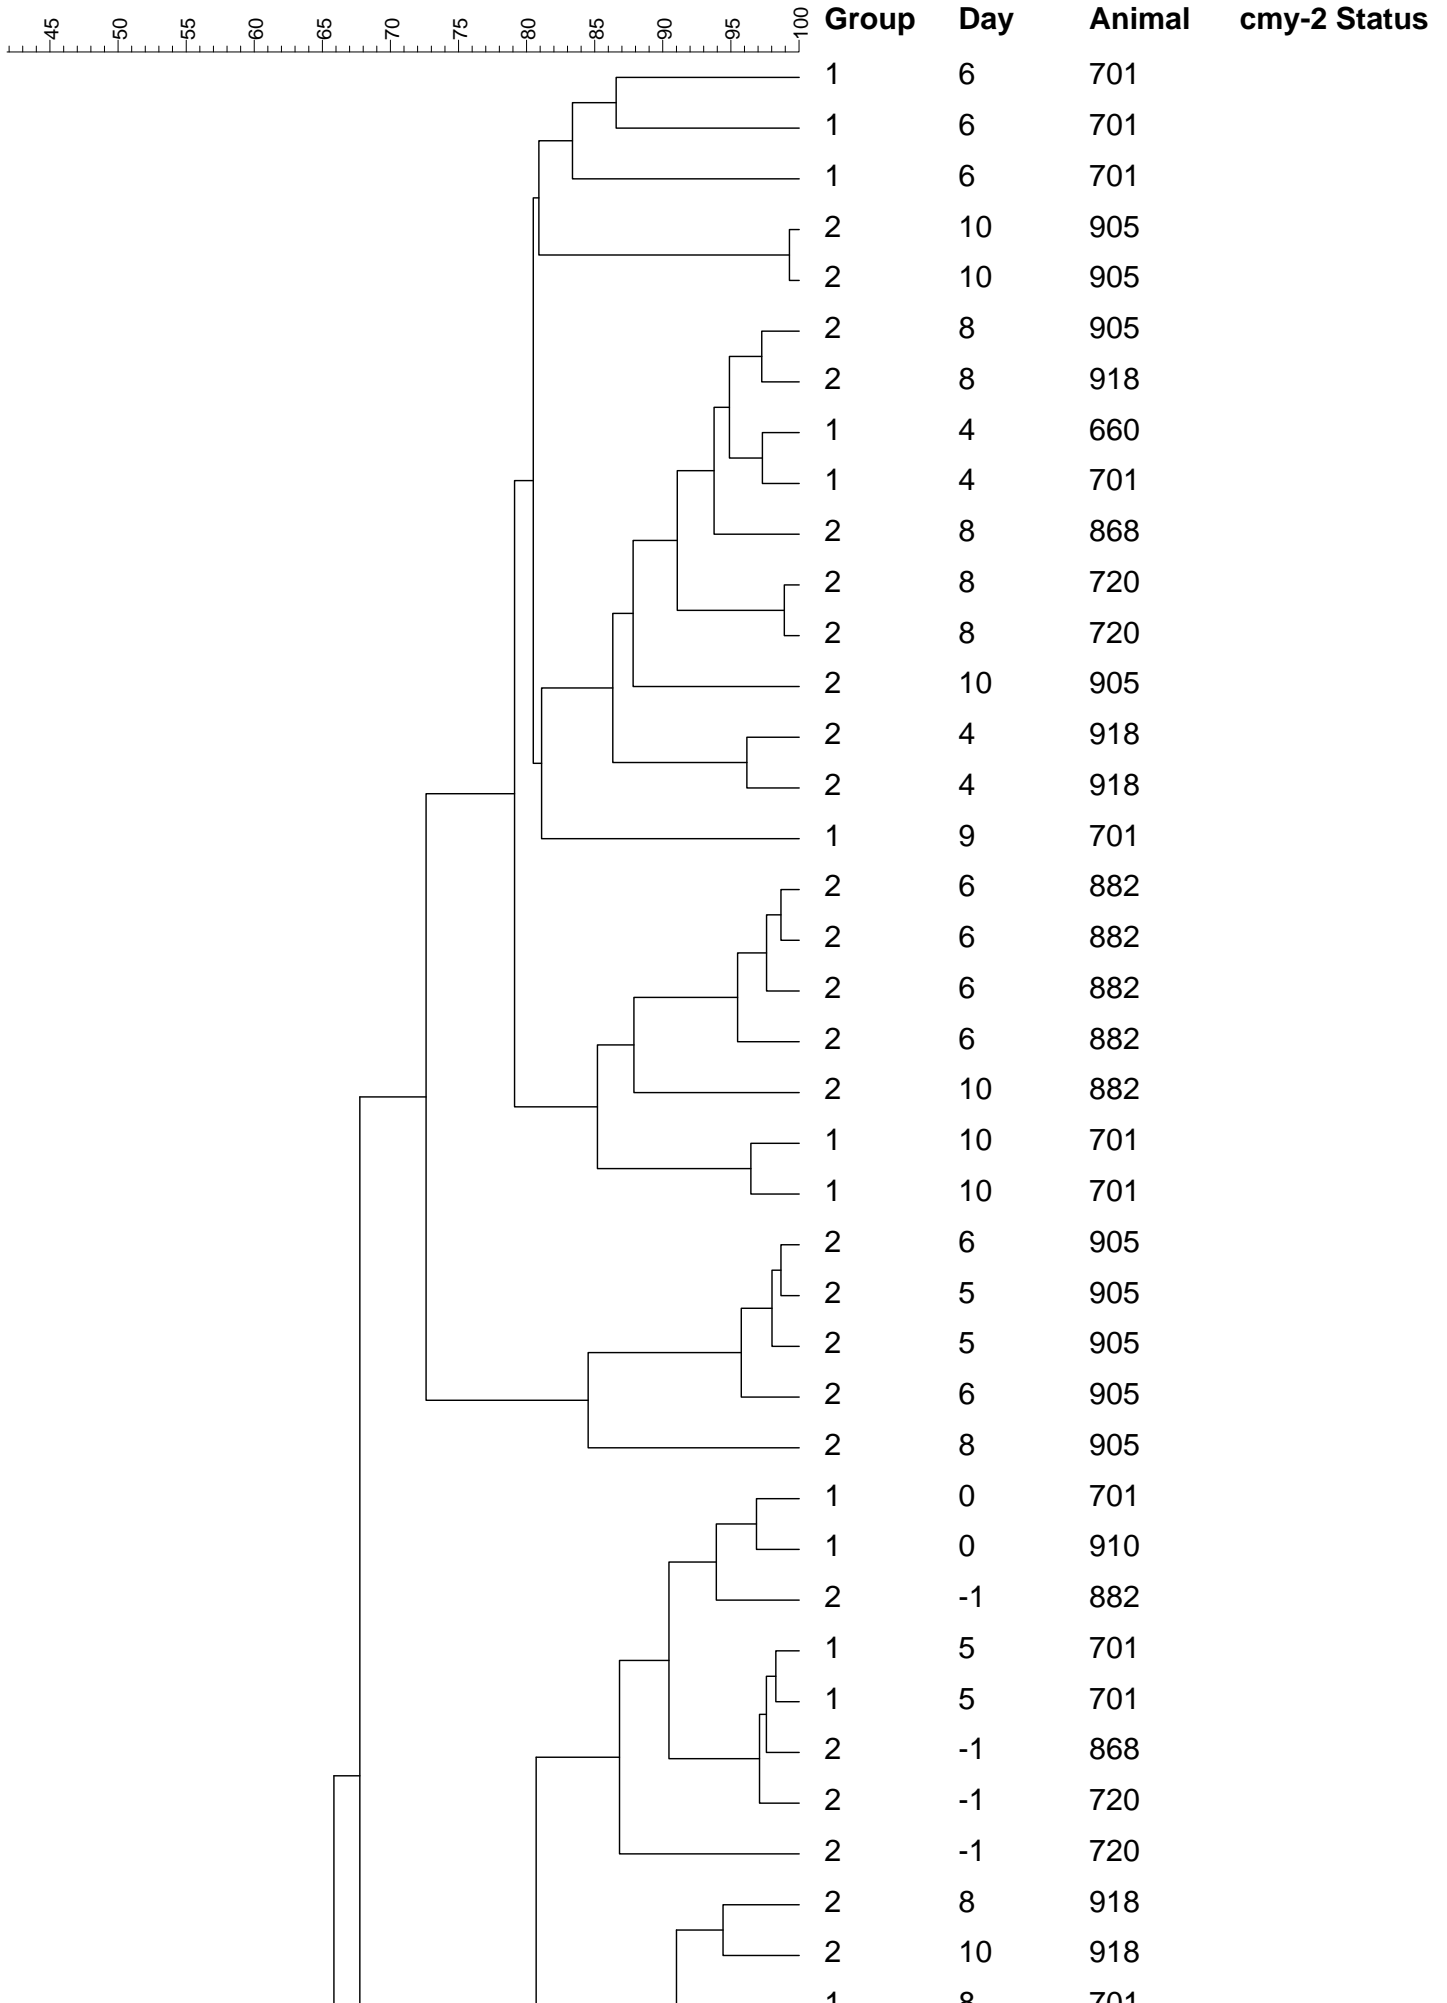

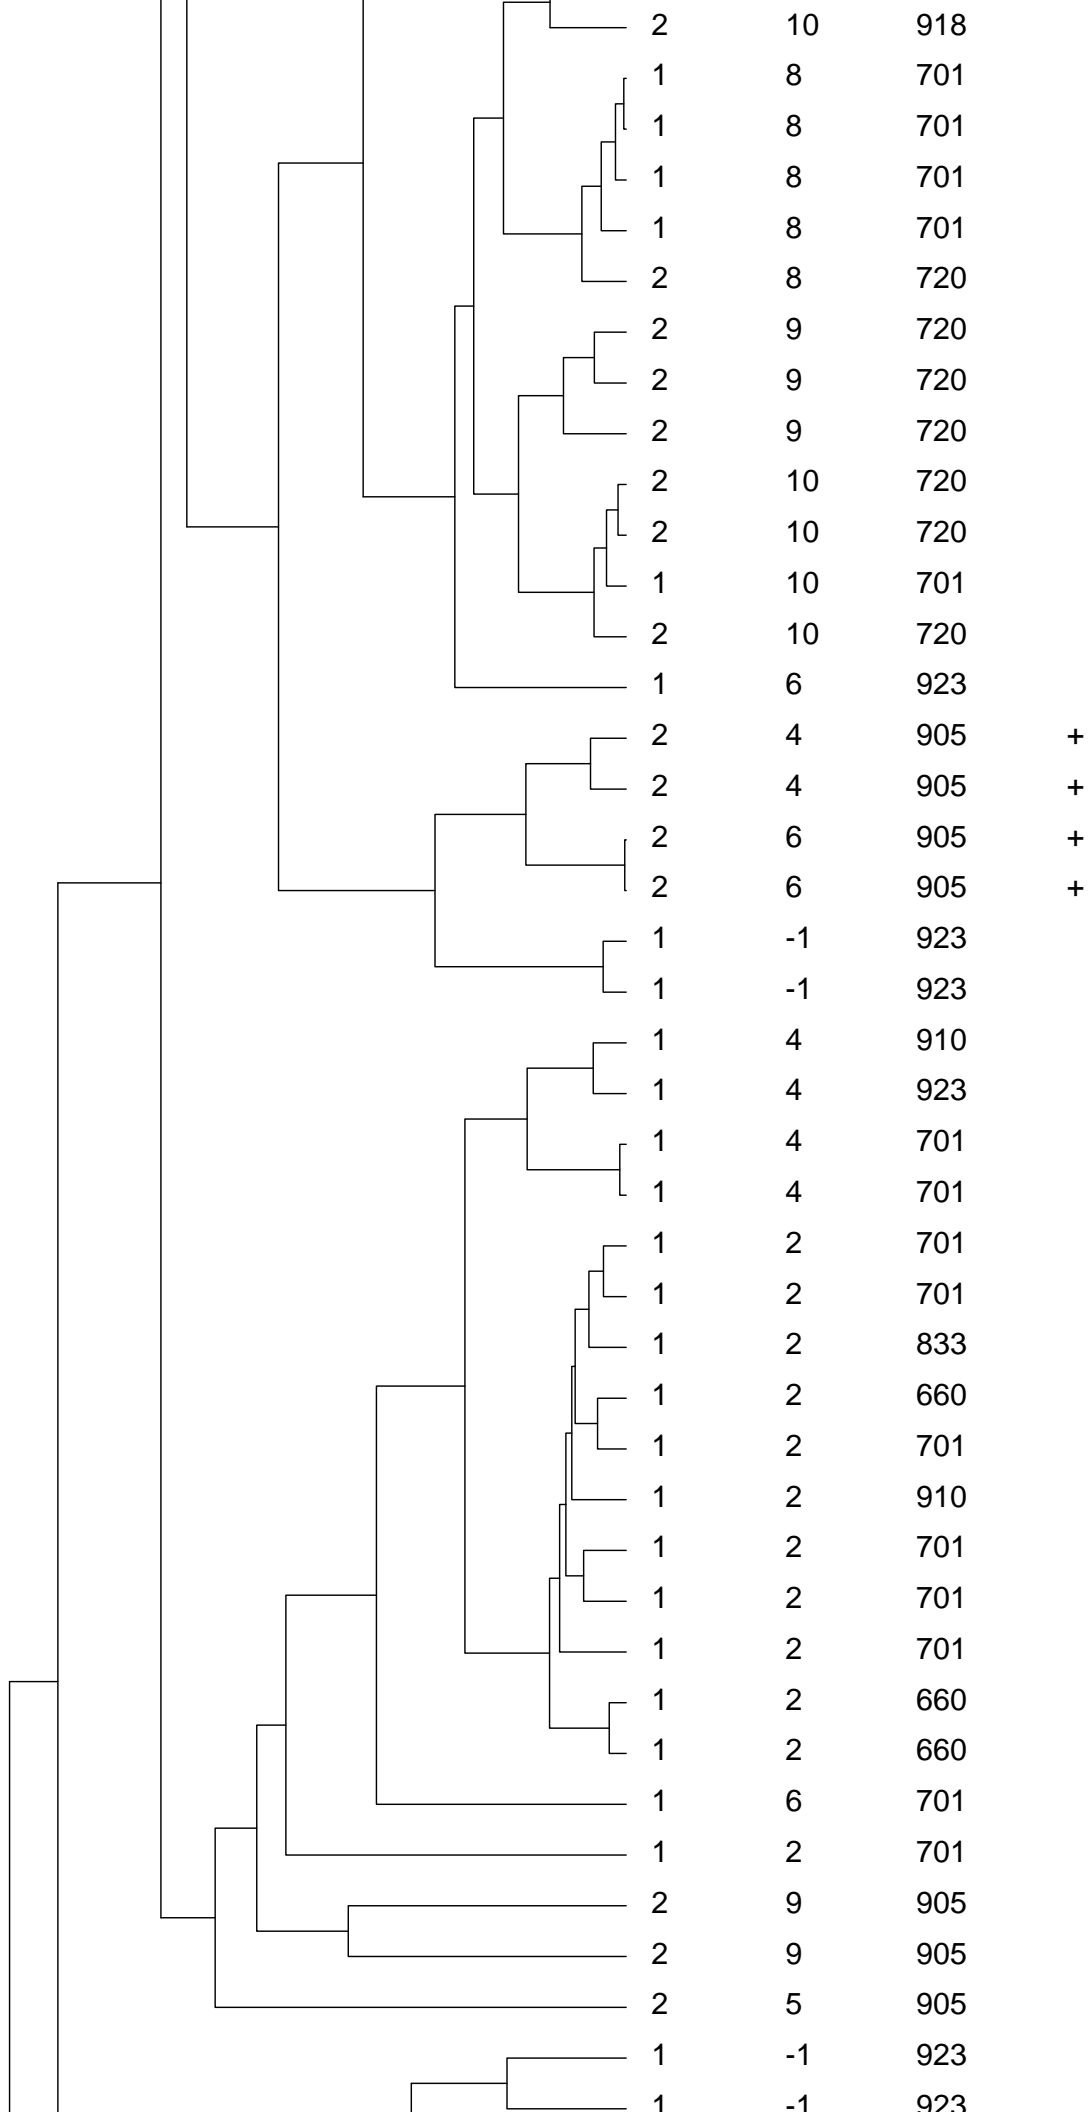

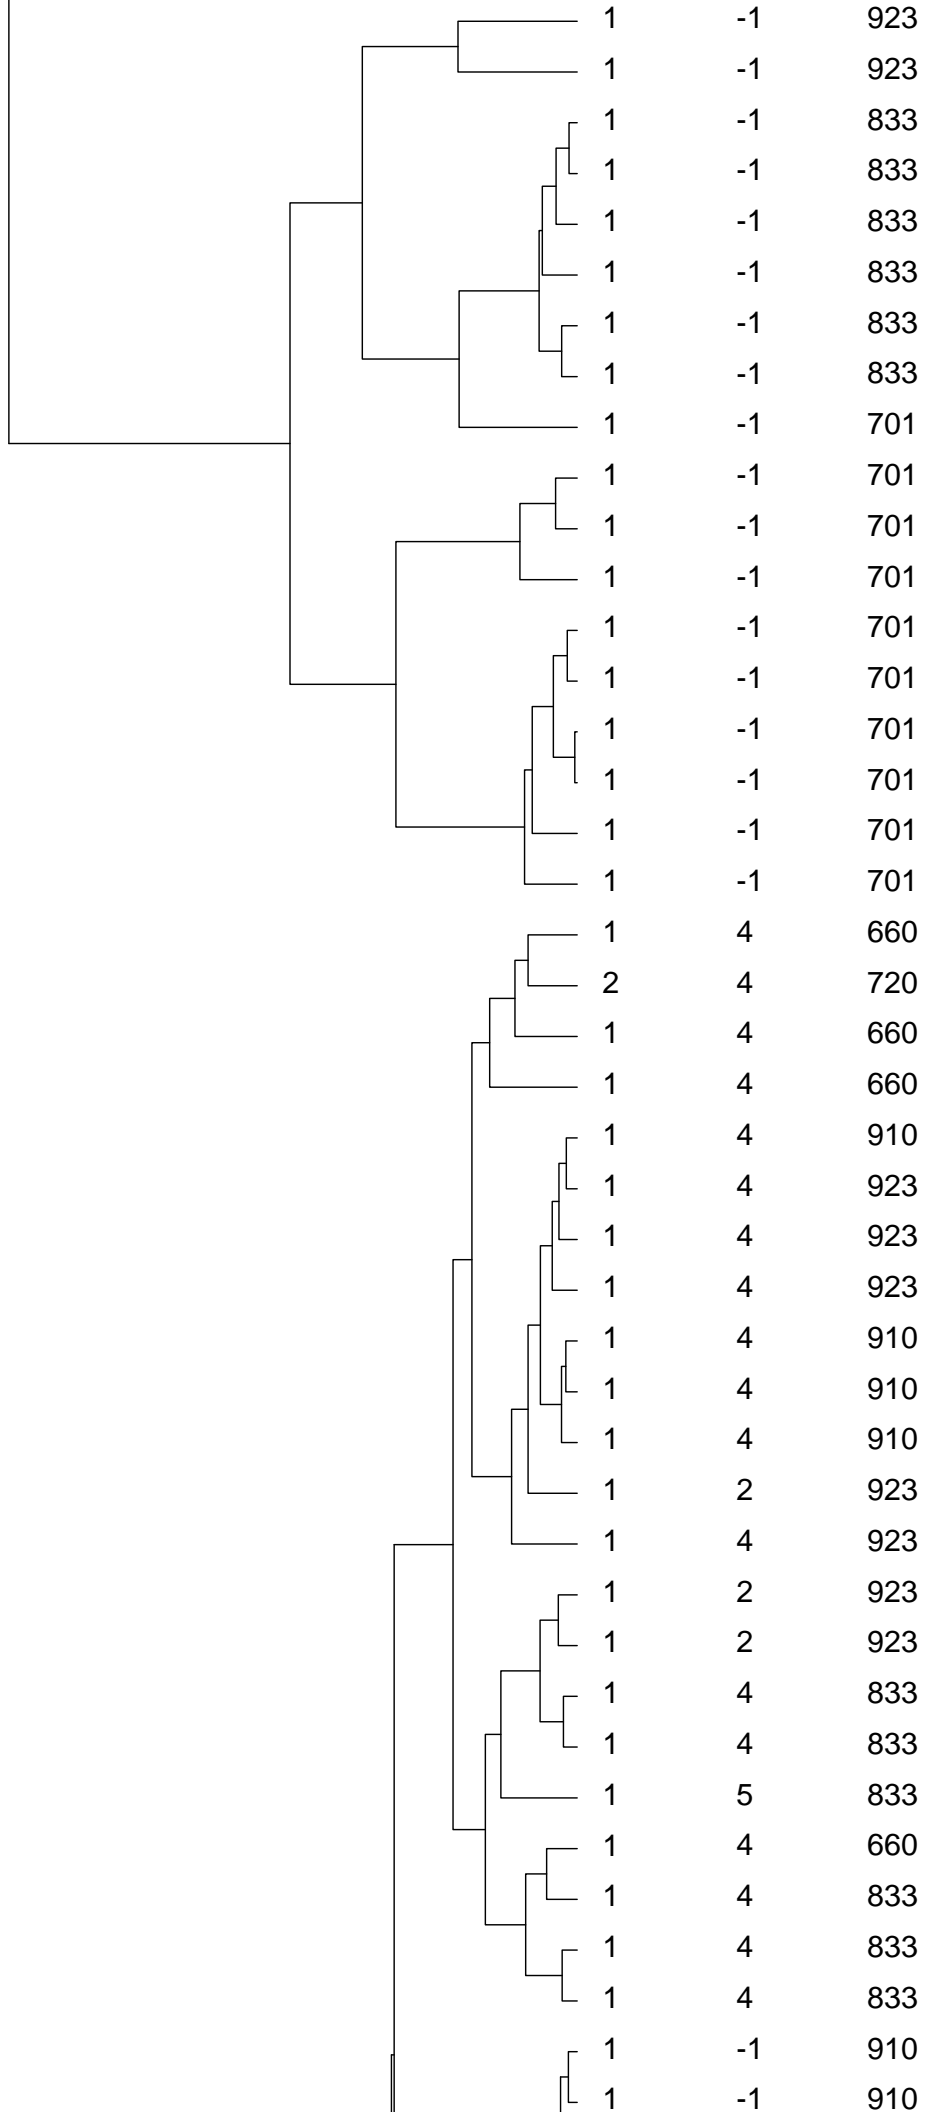

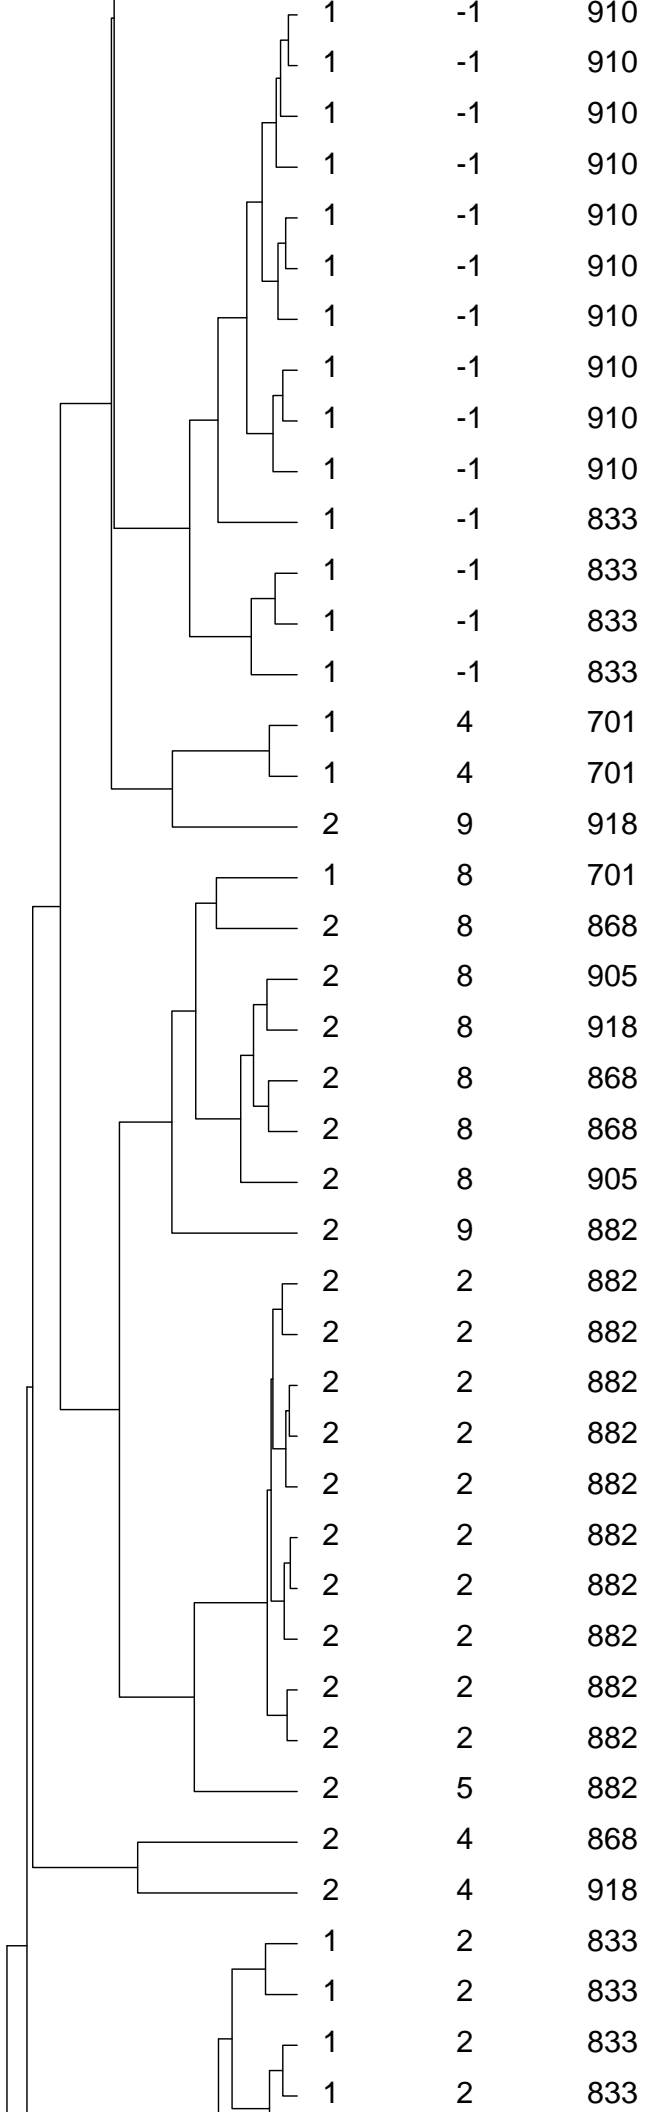

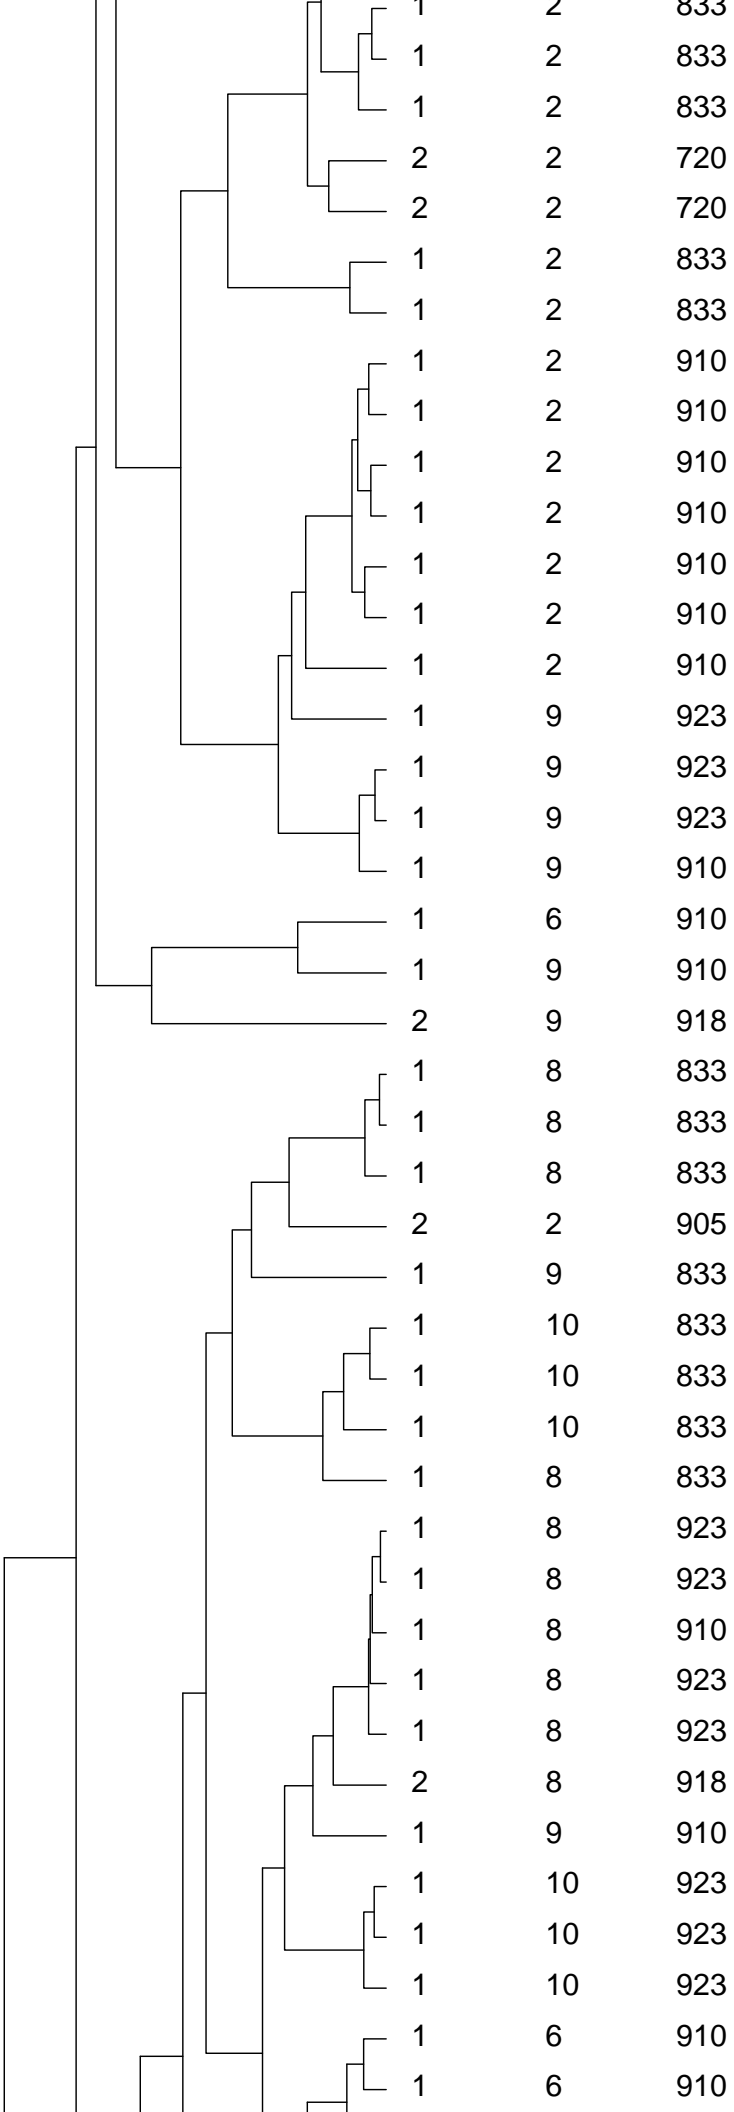

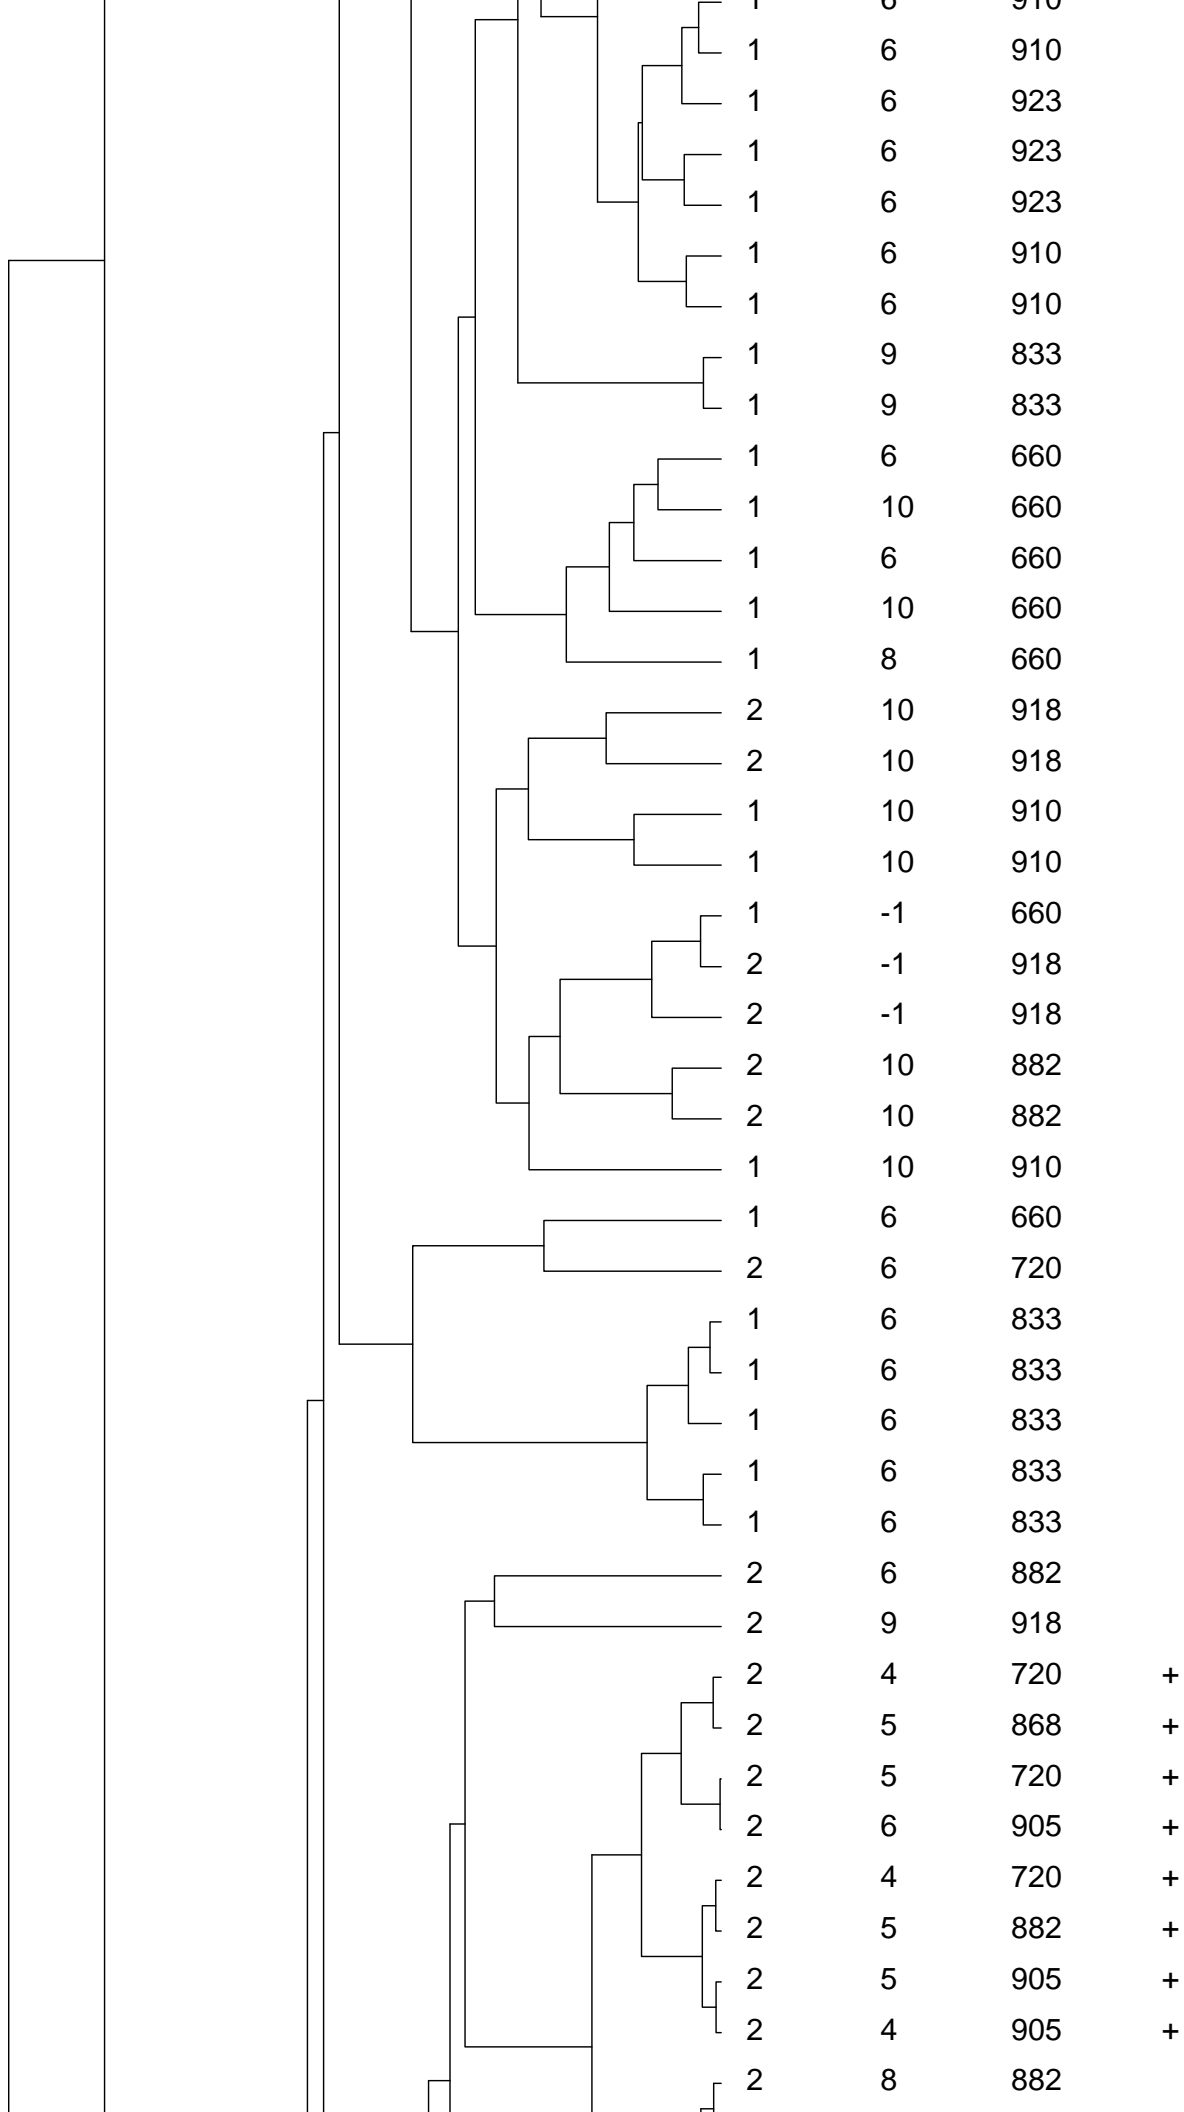

+  
+  
+  
+  
+  
+  
+

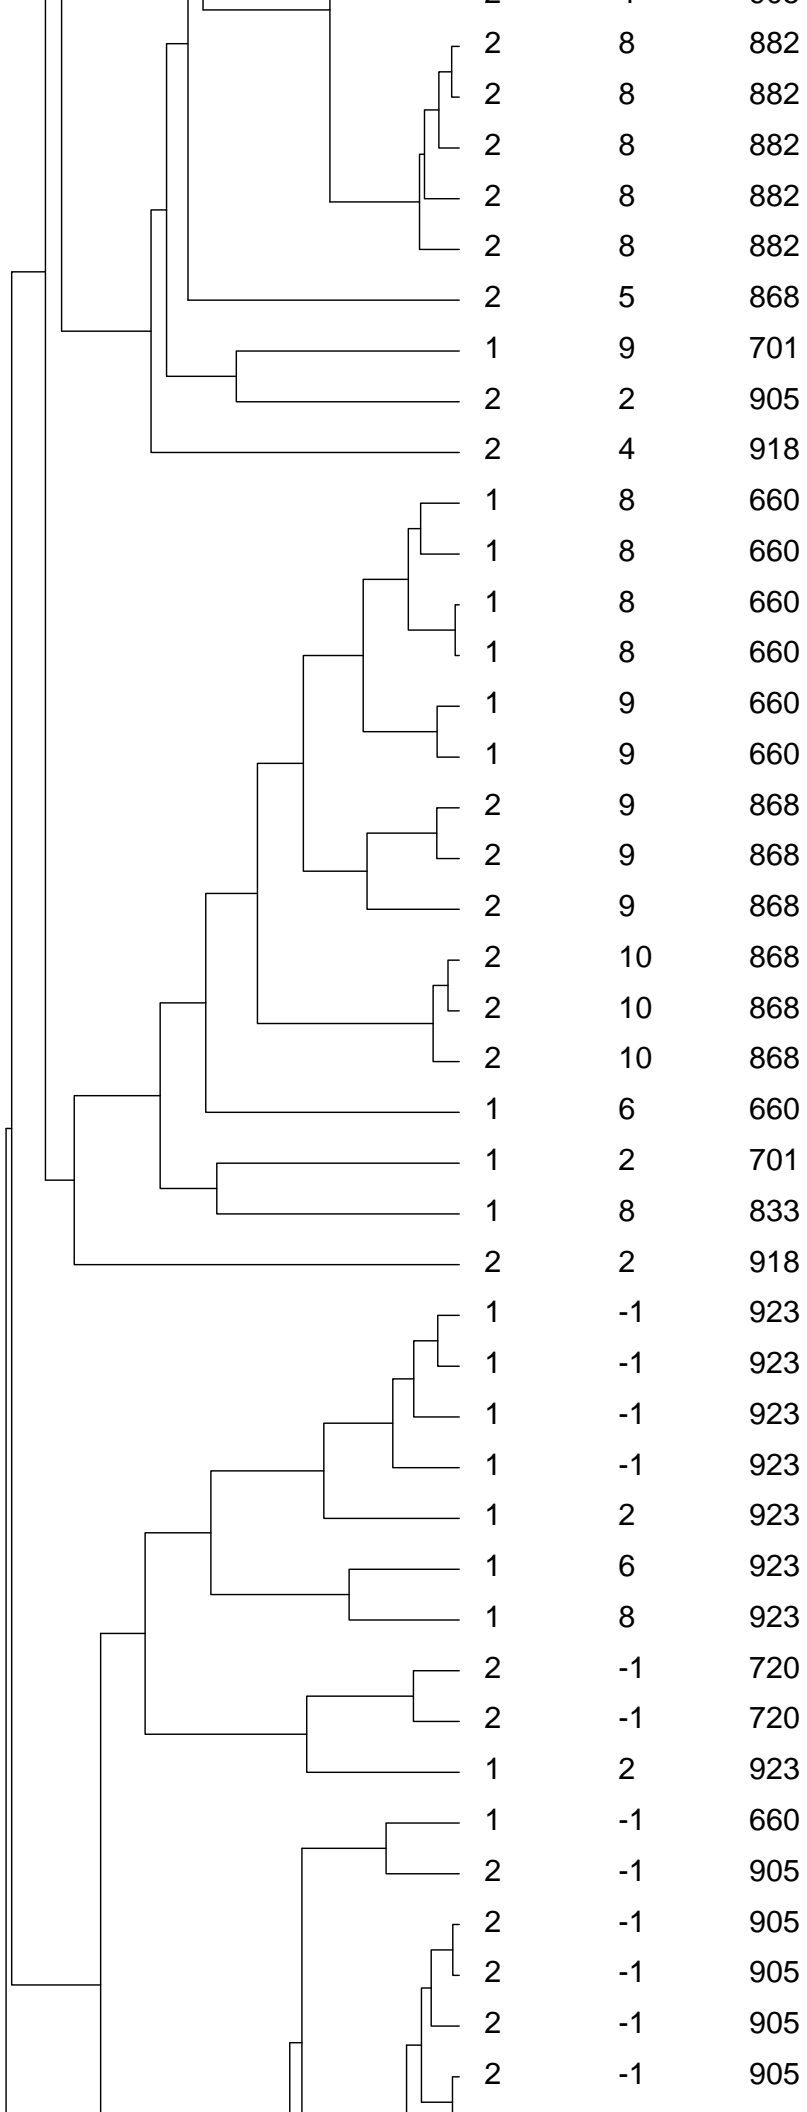



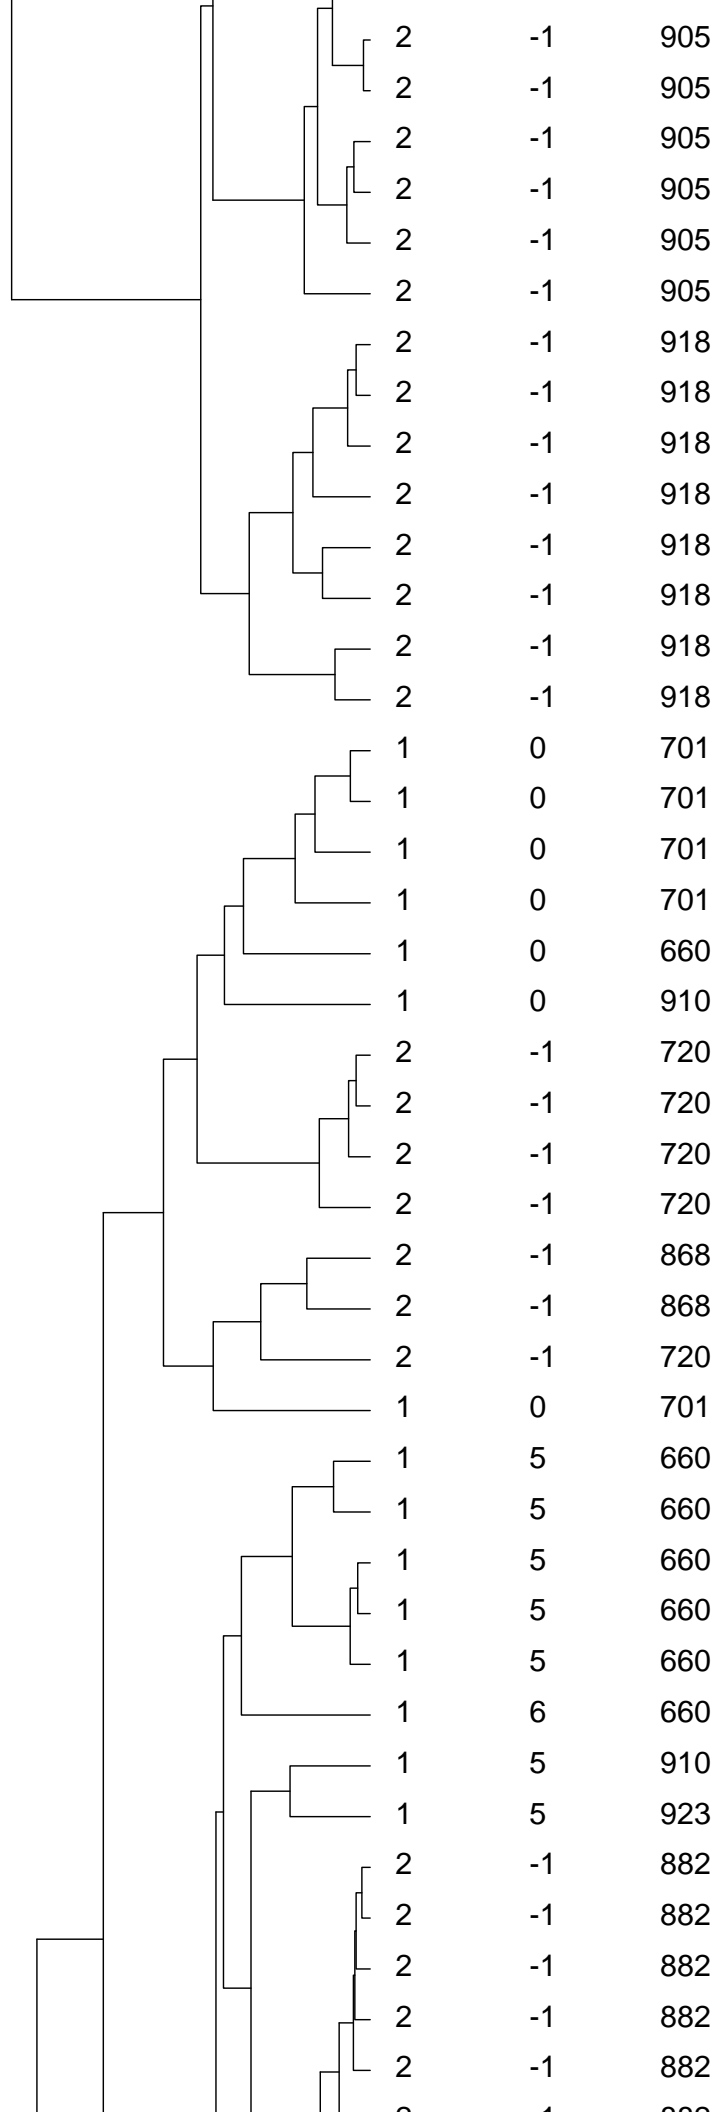

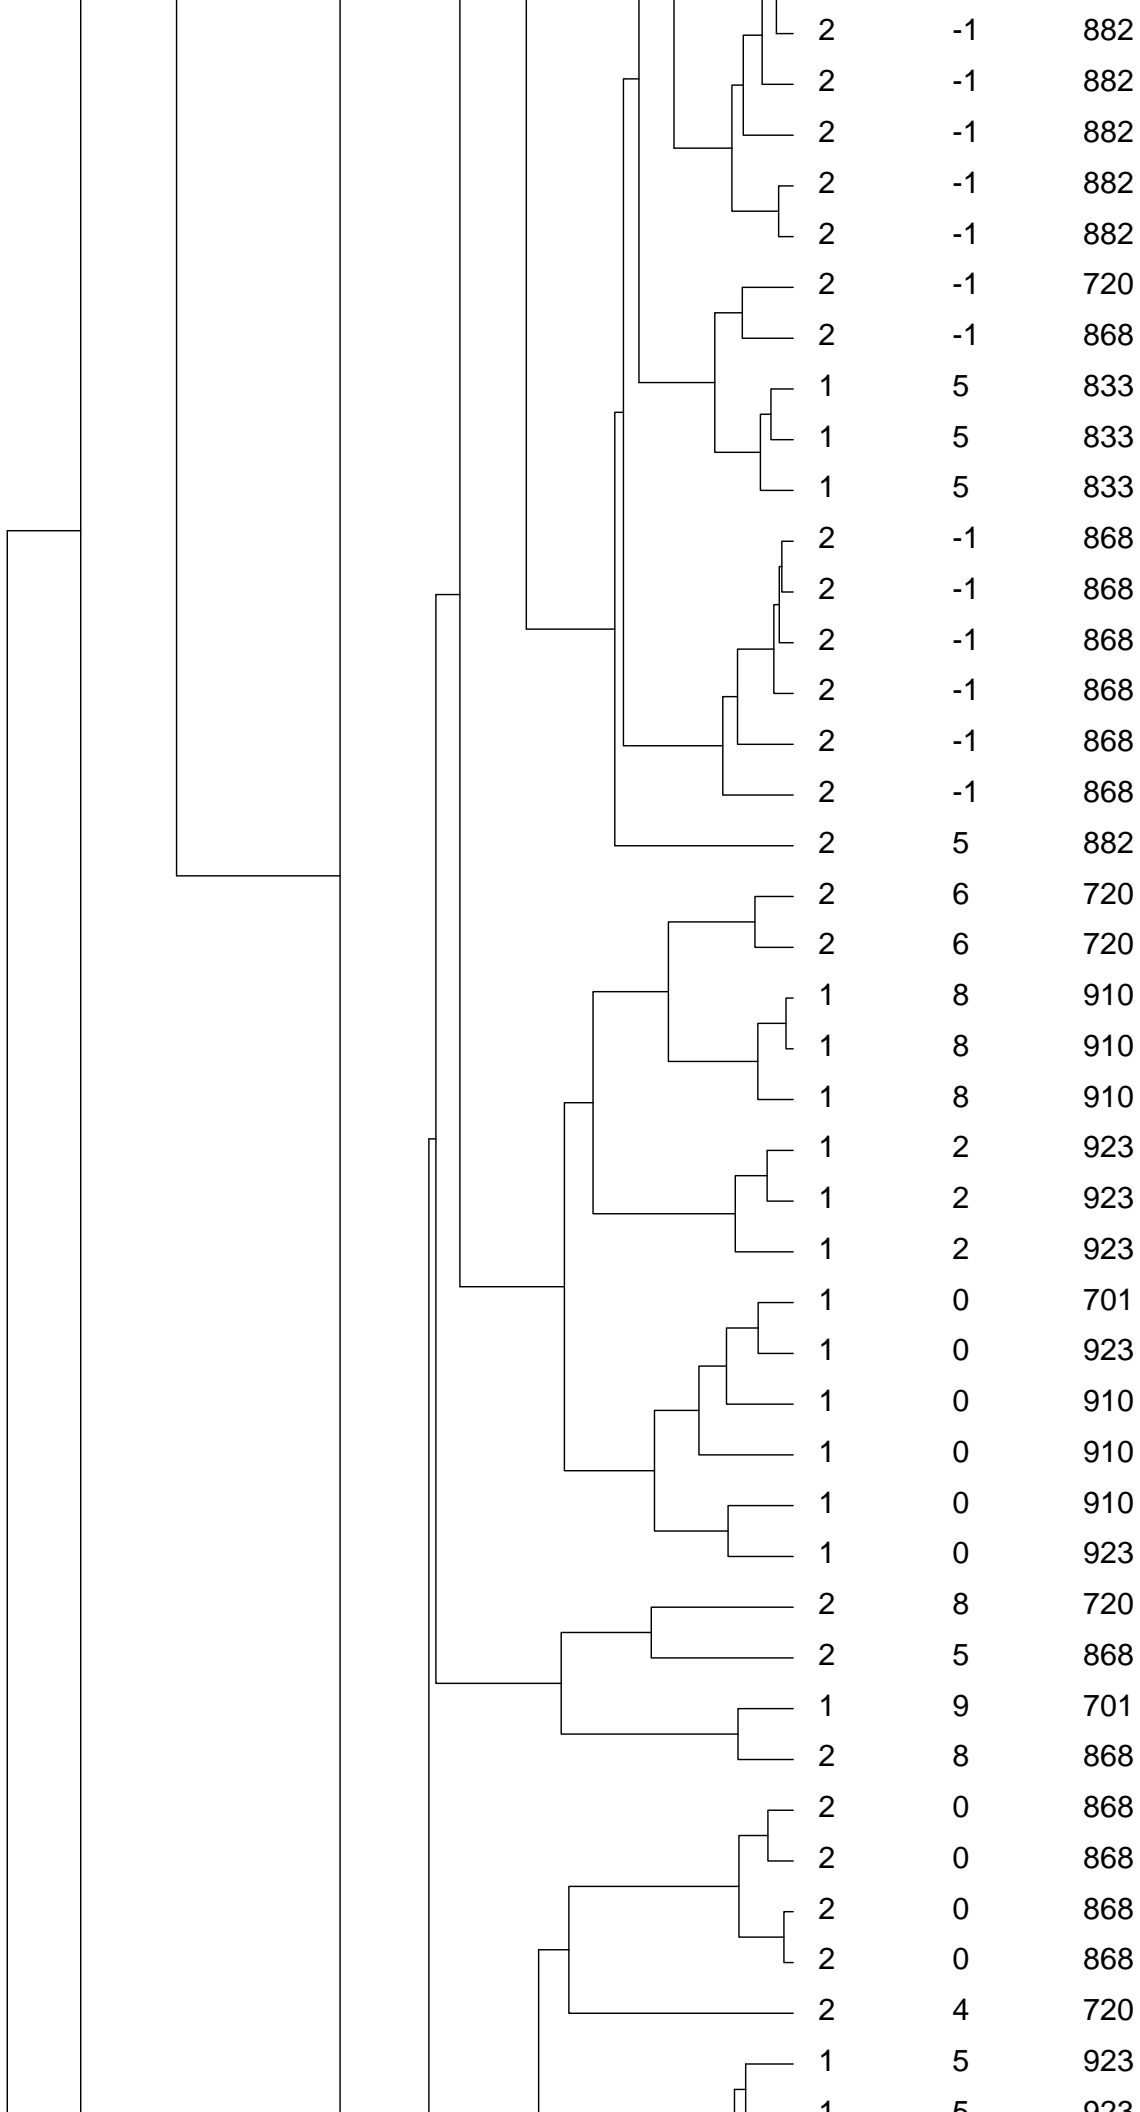

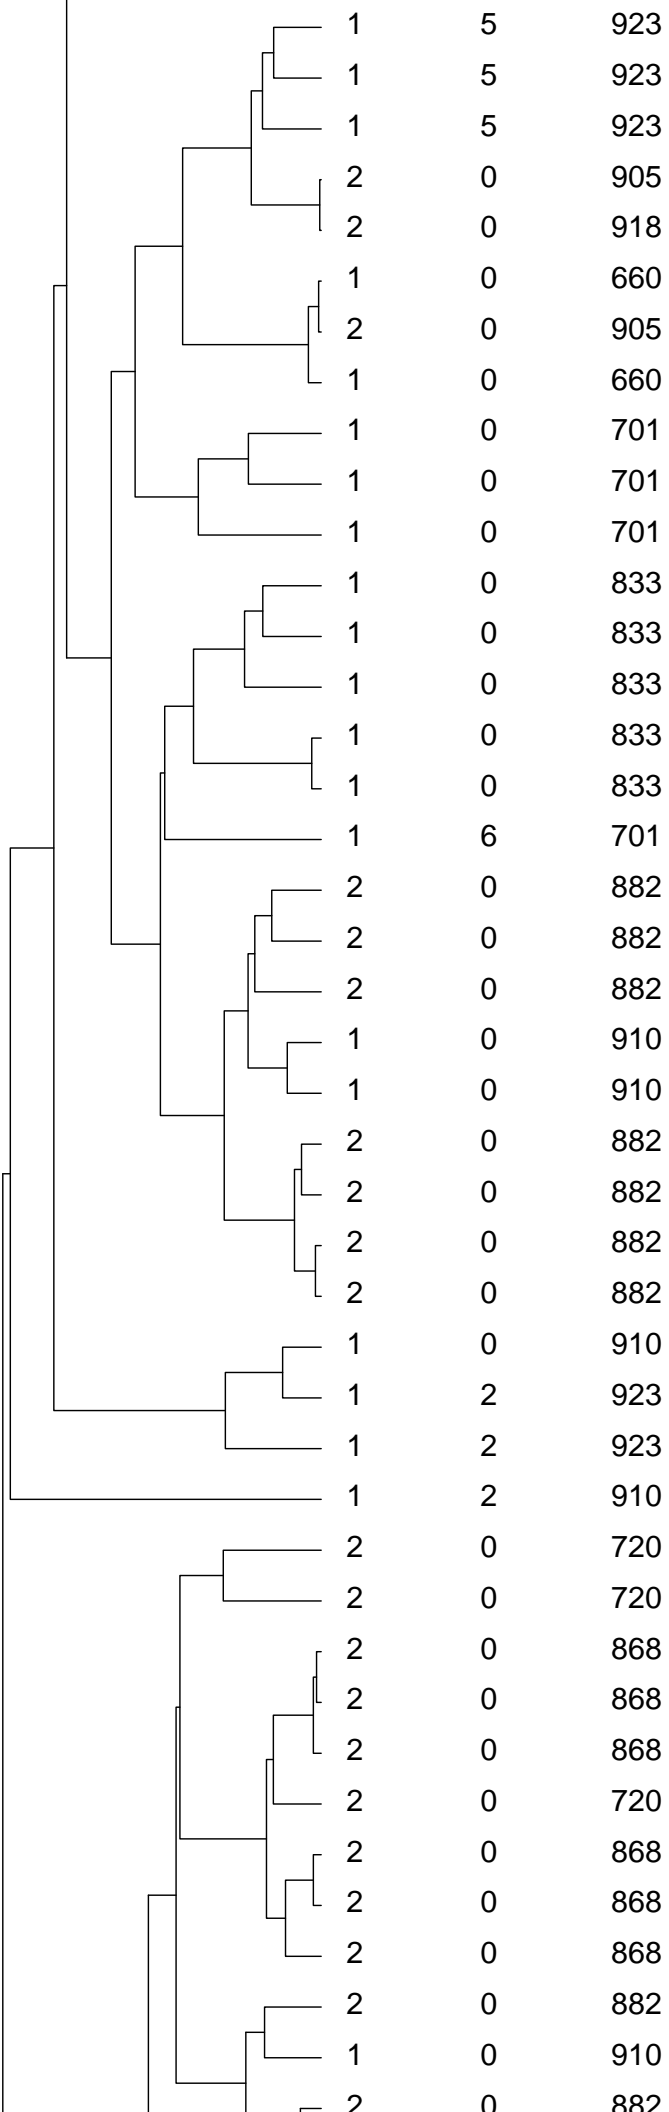

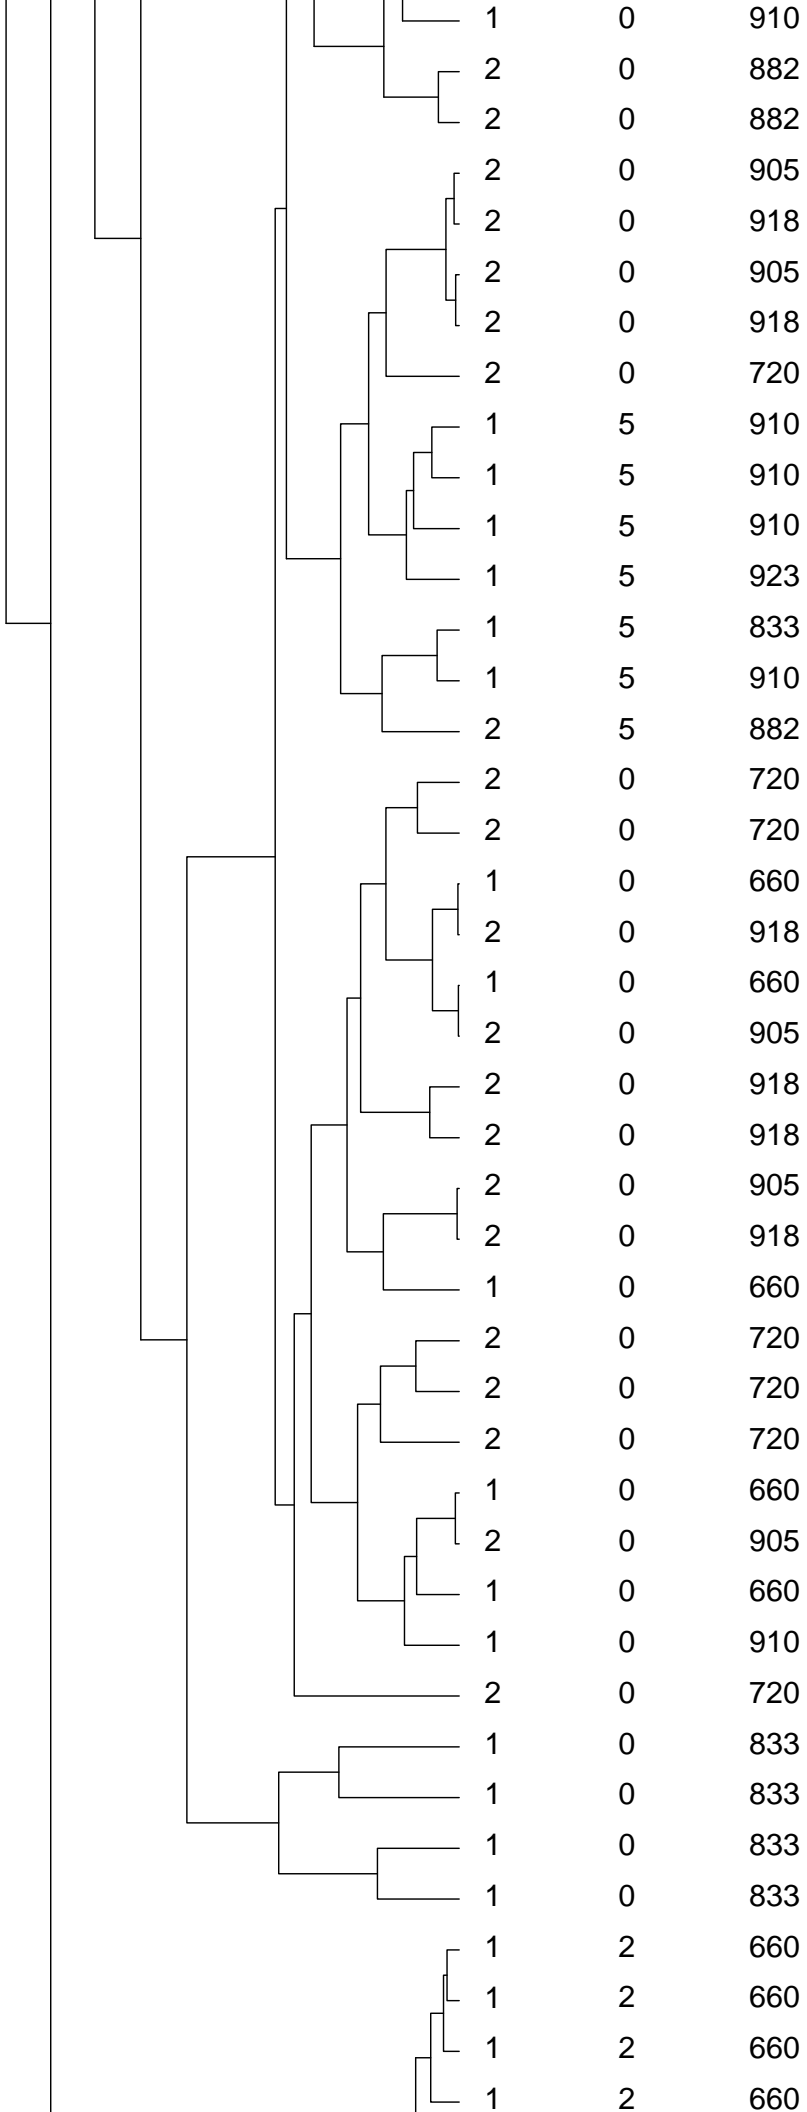

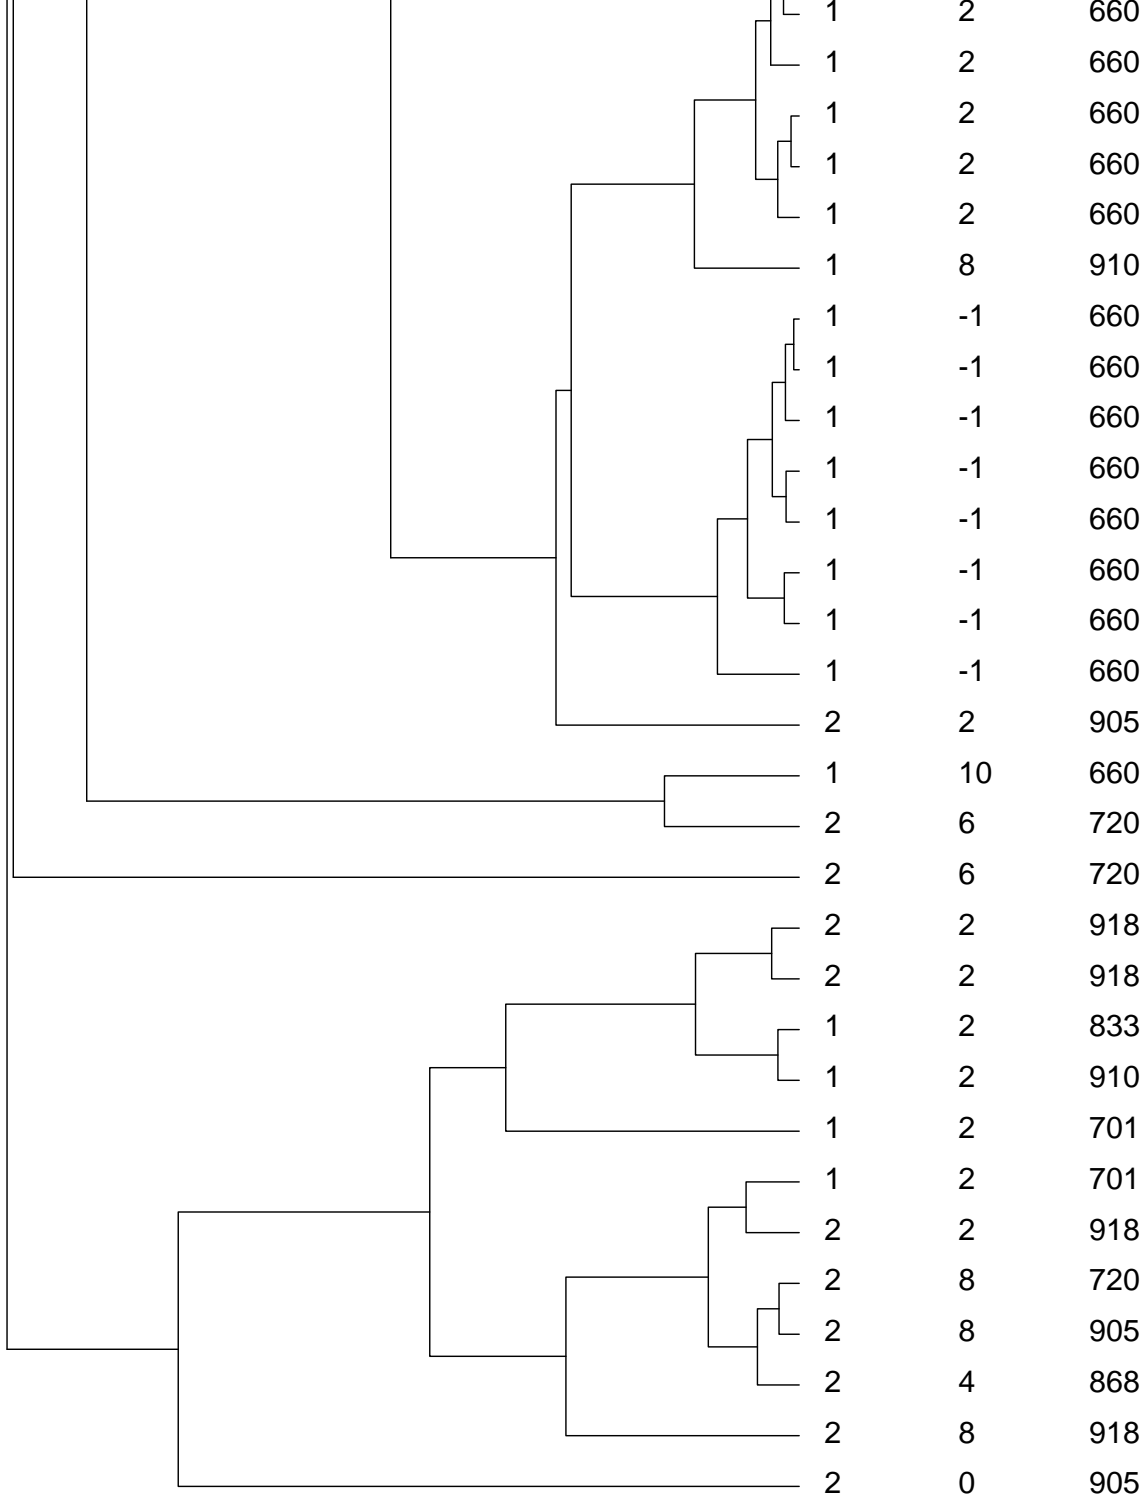

Supplement: supp_74_22_6956__1.pdf [file supp_74_22_6956__1.pdf]
